# Supplementary material
Source: PubMed Central journal article supplement (PMC3302646)
Supplement: pro0020-2023-SD1.pdf [file pro0020-2023-SD1.pdf]

Supplementary online materials for:

The interplay between transient  $\alpha$ -helix formation and side chain rotamer distributions in disordered proteins probed by methyl chemical shifts

Magnus Kjaergaard, Vytautas Iešmantavičius and Flemming M. Poulsen\*

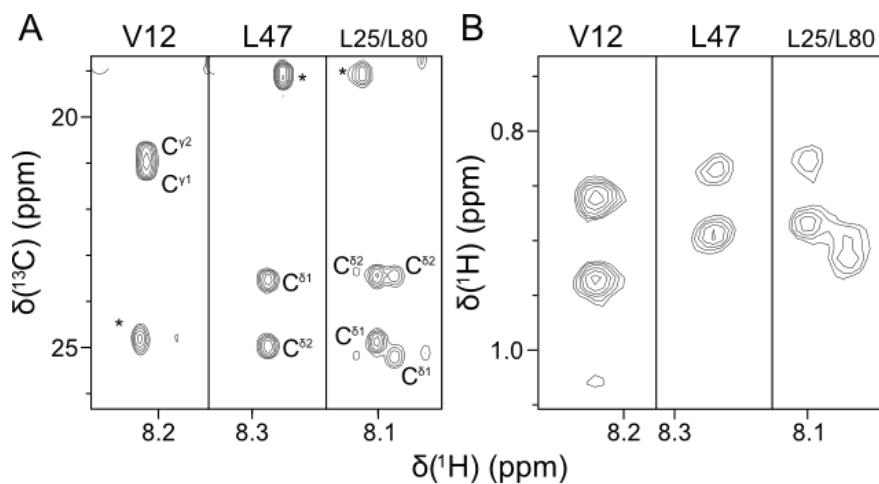

**Supplementary figure 1. Assignment of methyl groups by correlation to  $\text{H}^{\text{N}}(i+1)$  resonances.** C(CO)NH (A) and HC(CO)NH (B) spectra of ACBP at pH 2.4 readily allow assignment of methyl resonances from crowded spectral regions by correlation to the well dispersed amide resonances. Strips are centered on the amide frequencies of K13, D48 and F26/K81. \* indicates peaks from neighboring slides.

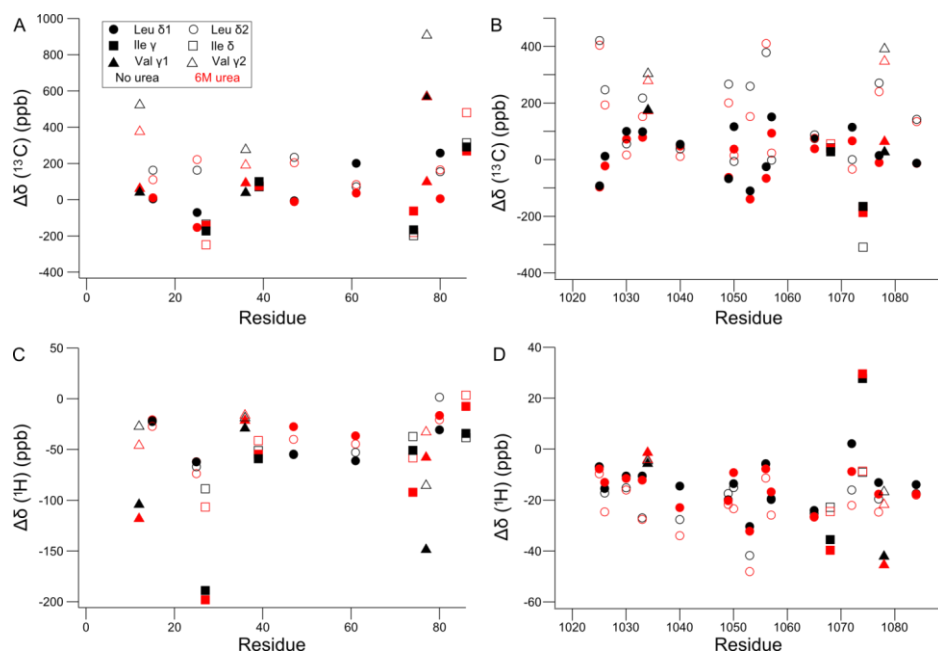

**Supplementary figure 2** Methyl secondary chemical shifts of ACBP (A & C) and ACTR (B & D). The secondary chemical shifts are calculated by subtracting random coil chemical shifts determined in Ac-GGXGG-NH<sub>2</sub> peptides (Table 1) from the experimental chemical shifts. Black and red symbols correspond to no urea or 6 M urea, respectively.

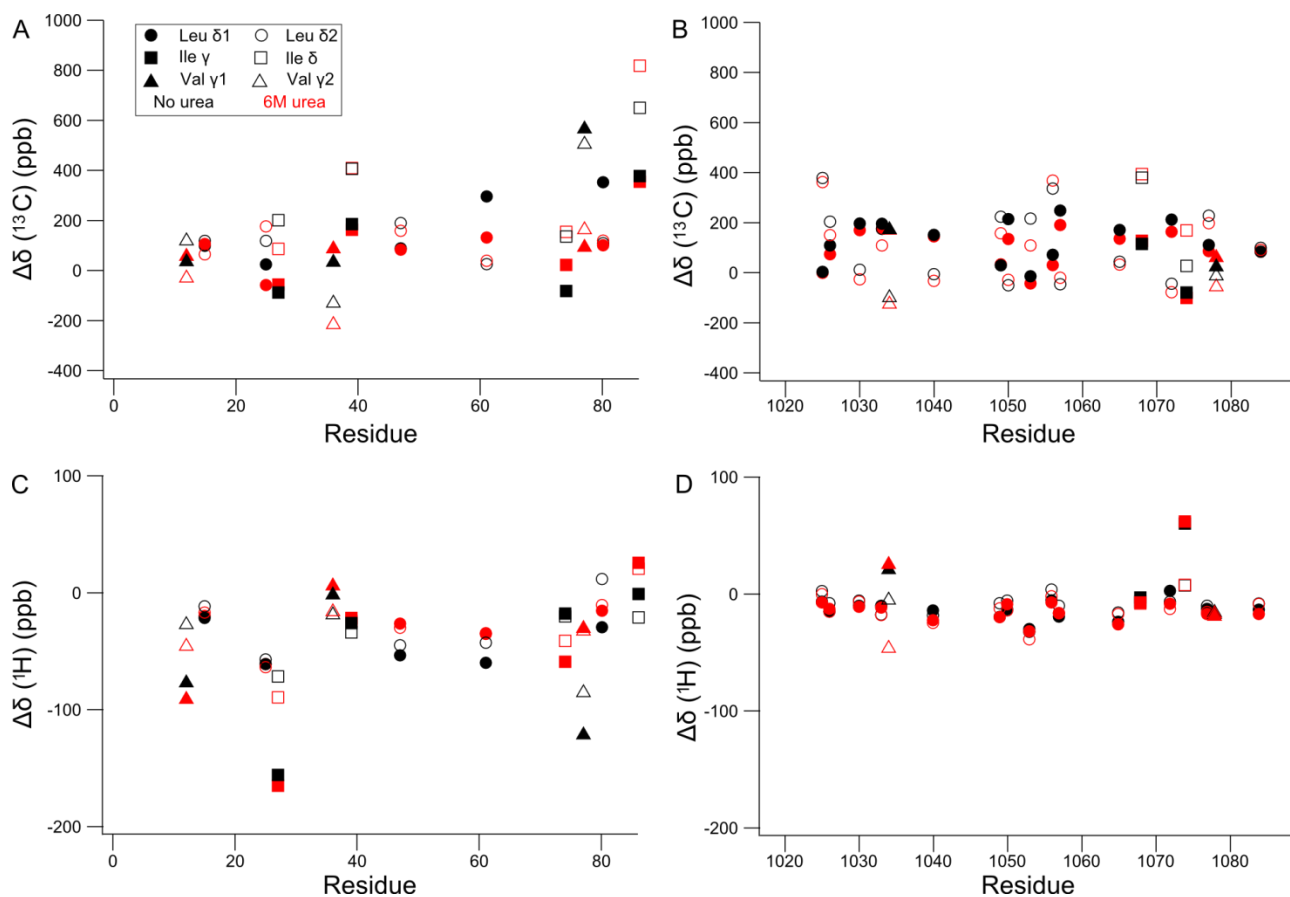

**Supplementary figure 3** Methyl secondary chemical shifts of ACBP (A & C) and ACTR (B & D). The secondary chemical shifts are calculated by subtracting random coil chemical shifts determined in Ac-QQXQQ-NH<sub>2</sub> peptides (Table 1) from the experimental chemical shifts. Black and red symbols correspond to no urea or 6 M urea, respectively.

**Supplementary table 1: Leu, Val and Ile methyl chemical shift for ACTR**

| Residue | Resonance | 0 M urea             |                       |                    | 6 M urea             |                       |                    | Resolved<br>in CT-<br>HSQC |
|---------|-----------|----------------------|-----------------------|--------------------|----------------------|-----------------------|--------------------|----------------------------|
|         |           | <sup>1</sup> H (ppm) | <sup>13</sup> C (ppm) | P <sub>t</sub> (%) | <sup>1</sup> H (ppm) | <sup>13</sup> C (ppm) | P <sub>t</sub> (%) |                            |
| L1024   | δ1        | 0.937                | 24.857                | 61.4               | 0.936                | 24.853                | 61.5               | n                          |
|         | δ2        | 0.885                | 23.720                |                    | 0.882                | 23.704                |                    | n                          |
| L1025   | δ1        | 0.929                | 24.962                | 64.2               | 0.931                | 24.927                | 64.3               | n                          |
|         | δ2        | 0.875                | 23.547                |                    | 0.867                | 23.493                |                    | n                          |
| L1029   | δ1        | 0.933                | 25.050                | 66.9               | 0.933                | 25.022                | 67.1               | n                          |
|         | δ2        | 0.877                | 23.355                |                    | 0.876                | 23.317                |                    | n                          |
| L1032   | δ1        | 0.933                | 25.049                | 65.3               | 0.932                | 25.029                | 65.8               | n                          |
|         | δ2        | 0.865                | 23.517                |                    | 0.864                | 23.452                |                    | n                          |
| V1033   | γ1        | 0.957                | 21.235                | -                  | 0.962                | 21.232                | -                  | y                          |
|         | γ2        | 0.955                | 20.584                |                    | 0.956                | 20.558                |                    | y                          |
| L1039   | δ1        | 0.930                | 25.004                | 66.7               | 0.921                | 24.998                | 66.9               | n                          |
|         | δ2        | 0.864                | 23.338                |                    | 0.858                | 23.311                |                    | n                          |
| L1048   | δ1        | 0.924                | 24.883                | 63.2               | 0.924                | 24.887                | 63.9               | n                          |
|         | δ2        | 0.875                | 23.566                |                    | 0.870                | 23.500                |                    | n                          |
| L1049   | δ1        | 0.930                | 25.067                | 67.7               | 0.935                | 24.987                | 66.7               | n                          |
|         | δ2        | 0.877                | 23.293                |                    | 0.869                | 23.315                |                    | n                          |
| L1052   | δ1        | 0.914                | 24.839                | 62.8               | 0.912                | 24.810                | 63.6               | n                          |
|         | δ2        | 0.850                | 23.559                |                    | 0.844                | 23.452                |                    | n                          |
| L1055   | δ1        | 0.938                | 24.925                | 62.5               | 0.936                | 24.884                | 61.7               | n                          |
|         | δ2        | 0.886                | 23.678                |                    | 0.881                | 23.710                |                    | n                          |
| L1056   | δ1        | 0.924                | 25.101                | 68.0               | 0.927                | 25.043                | 67.2               | n                          |
|         | δ2        | 0.873                | 23.298                |                    | 0.866                | 23.323                |                    | n                          |
| L1064   | δ1        | 0.920                | 25.024                | 66.4               | 0.918                | 24.988                | 66.1               | n                          |
|         | δ2        | 0.867                | 23.387                |                    | 0.865                | 23.376                |                    | n                          |
| I1067   | γ2        | 0.903                | 17.488                | 68.8               | 0.899                | 17.500                | 69.0               | y                          |
|         | δ1        | 0.865                | 13.082                |                    | 0.864                | 13.096                |                    | y                          |
| L1071   | δ1        | 0.946                | 25.064                | 67.6               | 0.935                | 25.016                | 67.5               | n                          |
|         | δ2        | 0.876                | 23.300                |                    | 0.870                | 23.266                |                    | n                          |
| I1073   | γ2        | 0.967                | 17.294                | 62.4               | 0.969                | 17.273                | 64.9               | y                          |
|         | δ1        | 0.879                | 12.731                |                    | 0.879                | 12.872                |                    | y                          |
| L1076   | δ1        | 0.931                | 24.964                | 63.9               | 0.926                | 24.940                | 64.0               | n                          |
|         | δ2        | 0.872                | 23.571                |                    | 0.867                | 23.540                |                    | n                          |
| V1077   | γ1        | 0.921                | 21.087                | -                  | 0.918                | 21.123                | -                  | y                          |
|         | γ2        | 0.943                | 20.671                |                    | 0.938                | 20.627                |                    | y                          |
| L1083   | δ1        | 0.930                | 24.938                | 65.0               | 0.926                | 24.937                | 65.0               | n                          |
|         | δ2        | 0.875                | 23.443                |                    | 0.874                | 23.434                |                    | n                          |

**Supplementary table 2: Leu, Val and Ile methyl chemical shift for ACBP**

| Residue | Resonance | 0M urea              |                       |                    | 6M urea              |                       |                    | Resolved<br>in CT-<br>HSQC |
|---------|-----------|----------------------|-----------------------|--------------------|----------------------|-----------------------|--------------------|----------------------------|
|         |           | <sup>1</sup> H (ppm) | <sup>13</sup> C (ppm) | P <sub>t</sub> (%) | <sup>1</sup> H (ppm) | <sup>13</sup> C (ppm) | P <sub>t</sub> (%) |                            |
| V12     | γ1        | 0.859                | 21.100                | -                  | 0.845                | 21.121                | -                  | y                          |
|         | γ2        | 0.933                | 20.803                | -                  | 0.914                | 20.655                | -                  | y                          |
| L15     | δ1        | 0.921                | 24.954                | 64.9               | 0.923                | 24.961                | 65.5               | n                          |
|         | δ2        | 0.870                | 23.463                | 64.9               | 0.865                | 23.410                | 65.5               | n                          |
| L25     | δ1        | 0.882                | 24.880                | 64.2               | 0.882                | 24.797                | 62.8               | y                          |
|         | δ2        | 0.825                | 23.463                | 64.2               | 0.818                | 23.521                | 62.8               | y                          |
| I27     | γ2        | 0.750                | 17.288                | 65.6               | 0.741                | 17.319                | 63.5               | y                          |
|         | δ1        | 0.799                | 12.906                | 65.6               | 0.781                | 12.791                | 63.5               | y                          |
| V36     | γ1        | 0.934                | 21.098                | -                  | 0.942                | 21.152                | -                  | y                          |
|         | γ2        | 0.941                | 20.556                | -                  | 0.944                | 20.470                | -                  | y                          |
| I39     | γ2        | 0.880                | 17.560                | 69.3               | 0.884                | 17.537                | 69.3               | y                          |
|         | δ1        | 0.837                | 13.111                | 69.3               | 0.847                | 13.114                | 69.3               | y                          |
| L47     | δ1        | 0.889                | 24.944                | 64.1               | 0.916                | 24.939                | 64.3               | n                          |
|         | δ2        | 0.837                | 23.534                | 64.1               | 0.852                | 23.504                | 64.3               | n                          |
| L61     | δ1        | 0.883                | 25.150                | 67.8               | 0.908                | 24.986                | 66.0               | n                          |
|         | δ2        | 0.839                | 23.371                | 67.8               | 0.847                | 23.384                | 66.0               | n                          |
| I74     | γ2        | 0.888                | 17.293                | 64.4               | 0.847                | 17.397                | 64.7               | y                          |
|         | δ1        | 0.851                | 12.841                | 64.4               | 0.830                | 12.859                | 64.7               | y                          |
| V77     | γ1        | 0.814                | 21.629                | -                  | 0.905                | 21.158                | -                  | y                          |
|         | γ2        | 0.874                | 21.188                | -                  | 0.927                | 20.847                | -                  | y                          |
| L80     | δ1        | 0.913                | 25.207                | 67.5               | 0.928                | 24.955                | 64.9               | n                          |
|         | δ2        | 0.894                | 23.454                | 67.5               | 0.871                | 23.465                | 64.9               | n                          |
| I86     | γ2        | 0.905                | 17.752                | 73.7               | 0.931                | 17.729                | 76.7               | y                          |
|         | δ1        | 0.850                | 13.353                | 73.7               | 0.892                | 13.521                | 76.7               | y                          |
